# Supplementary material for: Neutrophil extracellular traps promote clear cell renal cell carcinoma progression via TGFβ1-pSmad2-MMP9 signaling
Source: Research Square preprint supplement (doi:10.21203/rs.3.rs-7537412/v1), 2025-10-17
Supplement: Supplementary file 1 [file 6c7804e7bdbded8073d98487.xlsx]

## Sheet: Sheet1
Figure 2F			Caki-1				Caki-1				Caki-1				Caki-1
		Control	NETs	NETs + DnaseⅠ		Control	NETs	NETs + DnaseⅠ		Control	NETs	NETs + DnaseⅠ		Control	NETs	NETs + DnaseⅠ
	U6	21.7918	21.661	21.3221	U6	21.7918	21.661	21.3221	U6	21.7918	21.661	21.3221	U6	21.7918	21.661	21.3221
		21.8893	21.7895	22.0098		21.8893	21.7895	22.0098		21.8893	21.7895	22.0098		21.8893	21.7895	22.0098
		21.9535	21.5597	22.032		21.9535	21.5597	22.032		21.9535	21.5597	22.032		21.9535	21.5597	22.032
	CDK4	20.1132	19.1956	20.3865	CDK6	24.1559	23.1422	24.2634	Cyclin D1	20.7993	19.9911	20.8584	Cyclin E1	21.3487	20.606	21.7229
		19.8708	19.3231	20.4625		23.9031	23.213	24.3164		20.7314	20.1835	20.5701		21.5089	20.0919	21.4998
		20.2193	18.8941	20.3253		23.7355	22.8075	24.1878		20.7454	19.9821	20.5612		21.4344	20.1766	21.5776
			786-O				786-O				786-O				786-O
		Control	NETs	NETs + DnaseⅠ		Control	NETs	NETs + DnaseⅠ		Control	NETs	NETs + DnaseⅠ		Control	NETs	NETs + DnaseⅠ
	U6	20.2793	20.1179	19.1815	U6	20.9782	20.9649	20.8011	U6	20.9782	20.9649	20.8011	U6	20.9782	20.9649	20.8011
		20.3505	20.1072	20.3706		21.3388	20.6976	20.9492		21.3388	20.6976	20.9492		21.3388	20.6976	20.9492
		20.4052	19.9773	20.2209		21.3514	20.9096	21.2479		21.3514	20.9096	21.2479		21.3514	20.9096	21.2479
	CDK4	20.0192	19.2803	19.9731	CDK6	23.2021	21.4742	22.0996	Cyclin D1	23.2067	22.2266	22.635	Cyclin E1	24.4862	23.191	24.4237
		19.9001	19.4054	19.83		22.9058	21.5623	21.9727		23.2213	22.0918	23.0894		24.3693	23.2872	24.3071
		20.4118	19.4923	19.9775		22.7213	21.4659	22.0882		23.2669	21.9511	22.6055		23.9638	23.4687	24.4373
Figure 3C			Caki-1				Caki-1
		Control	NETs	NETs + DnaseⅠ		Control	NETs	NETs + DnaseⅠ
	U6	21.4379	21.3354	21.8492	U6	21.4379	21.3354	21.8492
		21.0866	21.4636	21.9989		21.0866	21.4636	21.9989
		21.2379	21.3841	22.0789		21.2379	21.3841	22.0789
	BAX	27.7456	28.755	28.1527	Bcl2	21.8928	20.9733	21.8505
		28.3157	28.5583	28.0455		22.1097	21.5036	21.7324
		27.4628	28.5003	27.5449		22.1536	21.2459	21.729
			786-O				786-O
		Control	NETs	NETs + DnaseⅠ		Control	NETs	NETs + DnaseⅠ
	U6	20.5309	20.6143	20.2059	U6	20.5309	20.6143	20.2059
		20.6836	20.3888	20.5605		20.6836	20.3888	20.5605
		20.7735	20.4512	20.4407		20.7735	20.4512	20.4407
	BAX	22.6797	23.2016	22.0264	Bcl2	28.5893	28.0386	28.937
		22.6409	23.0482	22.0168		28.4746	27.8602	28.8926
		22.6024	22.7554	22.1161		28.8698	27.7701	28.7186
Figure 4E			Caki-1				Caki-1				Caki-1				Caki-1
		Control	NETs	NETs + DnaseⅠ		Control	NETs	NETs + DnaseⅠ		Control	NETs	NETs + DnaseⅠ		Control	NETs	NETs + DnaseⅠ
	U6	21.5882	21.3125	21.8316	U6	21.5882	21.3125	21.8316	U6	21.5882	21.3125	21.8316	U6	21.5882	21.3125	21.8316
		21.4585	21.3431	22.0324		21.4585	21.3431	22.0324		21.4585	21.3431	22.0324		21.4585	21.3431	22.0324
		21.0738	21.5875	21.8139		21.0738	21.5875	21.8139		21.0738	21.5875	21.8139		21.0738	21.5875	21.8139
	E-cadherin	31.595	32.2241	31.7228	N-cadherin	24.002	23.0135	24.3135	Vimentin	16.9876	16.2235	17.1104	MMP9	33.7785	31.2313	32.6065
		31.6009	32.4466	32.27		23.9709	23.0359	24.6896		17.0873	16.204	17.2249		33.2215	31.282	32.6804
		31.344	32.8727	31.9534		24.1714	23.1345	24.3364		17.2125	16.1767	17.1169		33.0801	31.833	32.5641
			786-O				786-O				786-O				786-O
		Control	NETs	NETs + DnaseⅠ		Control	NETs	NETs + DnaseⅠ		Control	NETs	NETs + DnaseⅠ		Control	NETs	NETs + DnaseⅠ
	U6	20.5309	20.6143	20.2059	U6	20.2793	20.1179	19.1815	U6	20.5309	20.6143	20.2059	U6	20.8627	21.3358	21.5772
		20.6836	20.3888	20.5605		20.3505	20.1072	20.3706		20.6836	20.3888	20.5605		20.9847	21.3986	21.5916
		20.7735	20.4512	20.4407		20.4052	19.9773	20.2209		20.7735	20.4512	20.4407		20.9372	21.6359	21.5678
	E-cadherin	31.9901	32.8143	31.1481	N-cadherin	20.5574	19.6504	20.8795	Vimentin	17.4624	17.1307	17.5643	MMP9	30.7029	30.4361	32.517
		31.5364	32.1399	31.3925		20.5589	19.7974	20.1415		17.7109	17.0797	17.6471		30.9346	30.904	31.8572
		31.5831	32.4518	31.7521		20.5997	19.7975	20.1249		17.3529	16.9582	17.4578		30.9401	30.9004	32.9587
Figure 5H			Tissue				Tissue				Tissue				Tissue
		Control	LPS	LPS + DnaseⅠ		Control	LPS	LPS + DnaseⅠ		Control	LPS	LPS + DnaseⅠ		Control	LPS	LPS + DnaseⅠ
	U6	21.2555	21.04	21.0079	U6	20.1306	20.8149	20.7897	U6	20.1306	20.8149	20.7897	U6	21.2555	21.04	21.0079
		21.2904	21.1349	21.0965		20.9325	20.6395	20.6319		20.9325	20.6395	20.6319		21.2904	21.1349	21.0965
		21.1742	21.1583	21.1239		20.8943	20.7605	20.629		20.8943	20.7605	20.629		21.1742	21.1583	21.1239
	E-cadherin	34.125	35.3335	33.9842	N-cadherin	35.8322	31.3216	35.1828	Vimentin	24.7727	20.6063	22.3031	MMP9	31.0489	28.5413	29.5079
		34.9353	35.7306	34.1104		36.2549	32.381	35.14		24.5926	20.3903	22.4789		31.2341	28.6947	29.5869
		34.6427	35.5711	34.5405		35.2406	32.1999	35.1533		24.4267	20.239	22.1397		30.9717	28.6884	29.4313
Figure 6A			Caki-1				786-O				Figure 6C			Tissue
		Control	NETs	NETs + DnaseⅠ		Control	NETs	NETs + DnaseⅠ					Control	LPS	LPS + DnaseⅠ
	U6	21.5882	21.3125	21.8316	U6	20.8627	21.3358	21.5772				U6	20.1306	20.8149	20.7897
		21.4585	21.3431	22.0324		20.9847	21.3986	21.5916					20.9325	20.6395	20.6319
		21.0738	21.5875	21.8139		20.9372	21.6359	21.5678					20.8943	20.7605	20.629
	TGFβ1	22.1763	21.0318	21.6964	TGFβ1	22.1543	22.0917	22.5707				TGFβ1	29.952	26.3131	27.9467
		22.1168	21.0739	21.9066		22.414	22.0429	22.7911					30.0401	26.4904	28.2046
		22.1325	21.1002	21.9832		21.9748	22.0085	22.4877					29.7036	26.3095	28.4427
Figure 7GH		N1	T1		N2	T2		N3	T3		N4	T4
	U6	23.8242	23.8493		23.4617	22.4295		22.8535	20.12		23.8969	18.8155
		23.7503	24.1243		23.2692	22.4321		22.9033	20.0151		23.8617	18.6697
		24.1483	24.2875		23.405	22.281		22.8263	20.1435		23.6638	18.9359
	TGFβ1	27.6752	23.2945		26.7556	24.0835		29.1088	29.7884		35.5527	27.8149
		27.6315	23.2862		26.7583	24.0436		28.7449	29.9665		35.9442	27.8746
		27.706	23.1826		26.7189	24.0567		28.966	30.2137		34.7564	27.8363
		N5	T5		N6	T6		N7	T7		N8	T8
	U6	26.1768	24.8166		23.1948	19.8269		25.2745	23.4693		25.6805	22.7416
		26.2034	24.6773		23.1741	19.9875		25.3703	23.5891		25.9212	22.4133
		26.0496	24.6666		22.9954	19.872		25.2873	23.7106		25.9031	22.5356
	TGFβ1	30.9574	27.1938		25.1679	26.4516		28.5419	25.4004		30.8029	23.8121
		30.6535	27.0491		25.1109	26.3912		28.2023	25.4674		30.3617	23.8418
		30.5936	27.345		25.0142	26.3344		28.3579	25.5489		30.3562	23.6996
		N9	T9		N10	T10		N11	T11		N12	T12		N13	T13
	U6	25.1518	22.1085		25.6046	22.9784		22.6567	22.8222		22.8451	21.5017		17.3302	21.2224
		25.1273	22.2941		25.3454	23.0096		22.6585	22.6404		22.9694	19.8165		17.64	20.4482
		25.0369	22.3477		25.2262	22.8855		22.4326	22.9085		22.7421	20.1302		17.3648	20.5489
	TGFβ1	31.9378	21.2881		31.0737	25.7393		26.4183	26.8449		28.7235	24.9955		25.0301	22.3425
		31.9722	21.398		30.9025	25.6279		26.6061	26.8786		29.0163	25.2556		24.9091	22.182
		31.7091	21.5184		30.8669	25.4951		26.5131	27.165		28.9638	25.3051		25.1953	22.5442
Figure 8G		Caki-1			Caki-1			786-O			786-O
		Control	TGFβ1 OE		Non-silencer	TGFβ1 KD		Control	TGFβ1 OE		Non-silencer	TGFβ1 KD		Figure 8I			Caki-1
	U6	21.2308	20.1874		19.8967	19.6542		20.7506	20.4946		19.0804	18.814				Input	IgG	p-Smad2/MMP9
		21.2656	20.3169		20.9963	19.5909		20.6877	20.511		18.9758	18.997				22.1265	30.0129	28.0067
		21.2759	20.1278		20.7819	20.0352		20.7685	20.5427		19.8704	19.4185				21.9934	29.6405	27.9901
																21.844	29.5621	28.3877
	TGFβ1	27.5786	22.3181		22.5151	22.9748		24.3174	22.7239		22.7324	23.3258
		27.6169	22.9176		22.6226	22.6402		24.5146	22.7181		22.4983	23.1576
		27.4502	22.8397		22.6897	23.1828		24.7604	22.8636		22.8282	23.8384
																	786-O
																Input	IgG	p-Smad2/MMP9
	U6	20.9786	19.4975		19.8967	20.6542		19.2541	18.5858		19.0804	18.814				20.2581	26.8741	25.1339
		20.979	19.5051		20.9963	19.5909		19.5738	19.9745		18.9758	18.997				20.2077	26.7321	25.0922
		20.8817	19.4343		20.7819	20.0352		19.9733	19.7899		19.8704	19.4185				20.0704	26.7267	26.1022
	MMP9	28.5502	23.5989		27.9089	28.4069		30.5975	29.1477		27.2359	28.2155
		28.3329	24.9376		27.6868	28.1335		30.2353	29.3001		27.6684	28.4617
		28.3365	23.6851		27.9362	28.4626		30.6429	29.4037		27.3414	28.1478
