# Supplementary material for: Neutrophil extracellular traps promote clear cell renal cell carcinoma progression via TGFβ1-pSmad2-MMP9 signaling
Source: Research Square preprint supplement (doi:10.21203/rs.3.rs-7537412/v1), 2025-10-17
Supplement: Supplementary file 2 [file f09da5c95ab8ba0c71ea0c6d.docx]

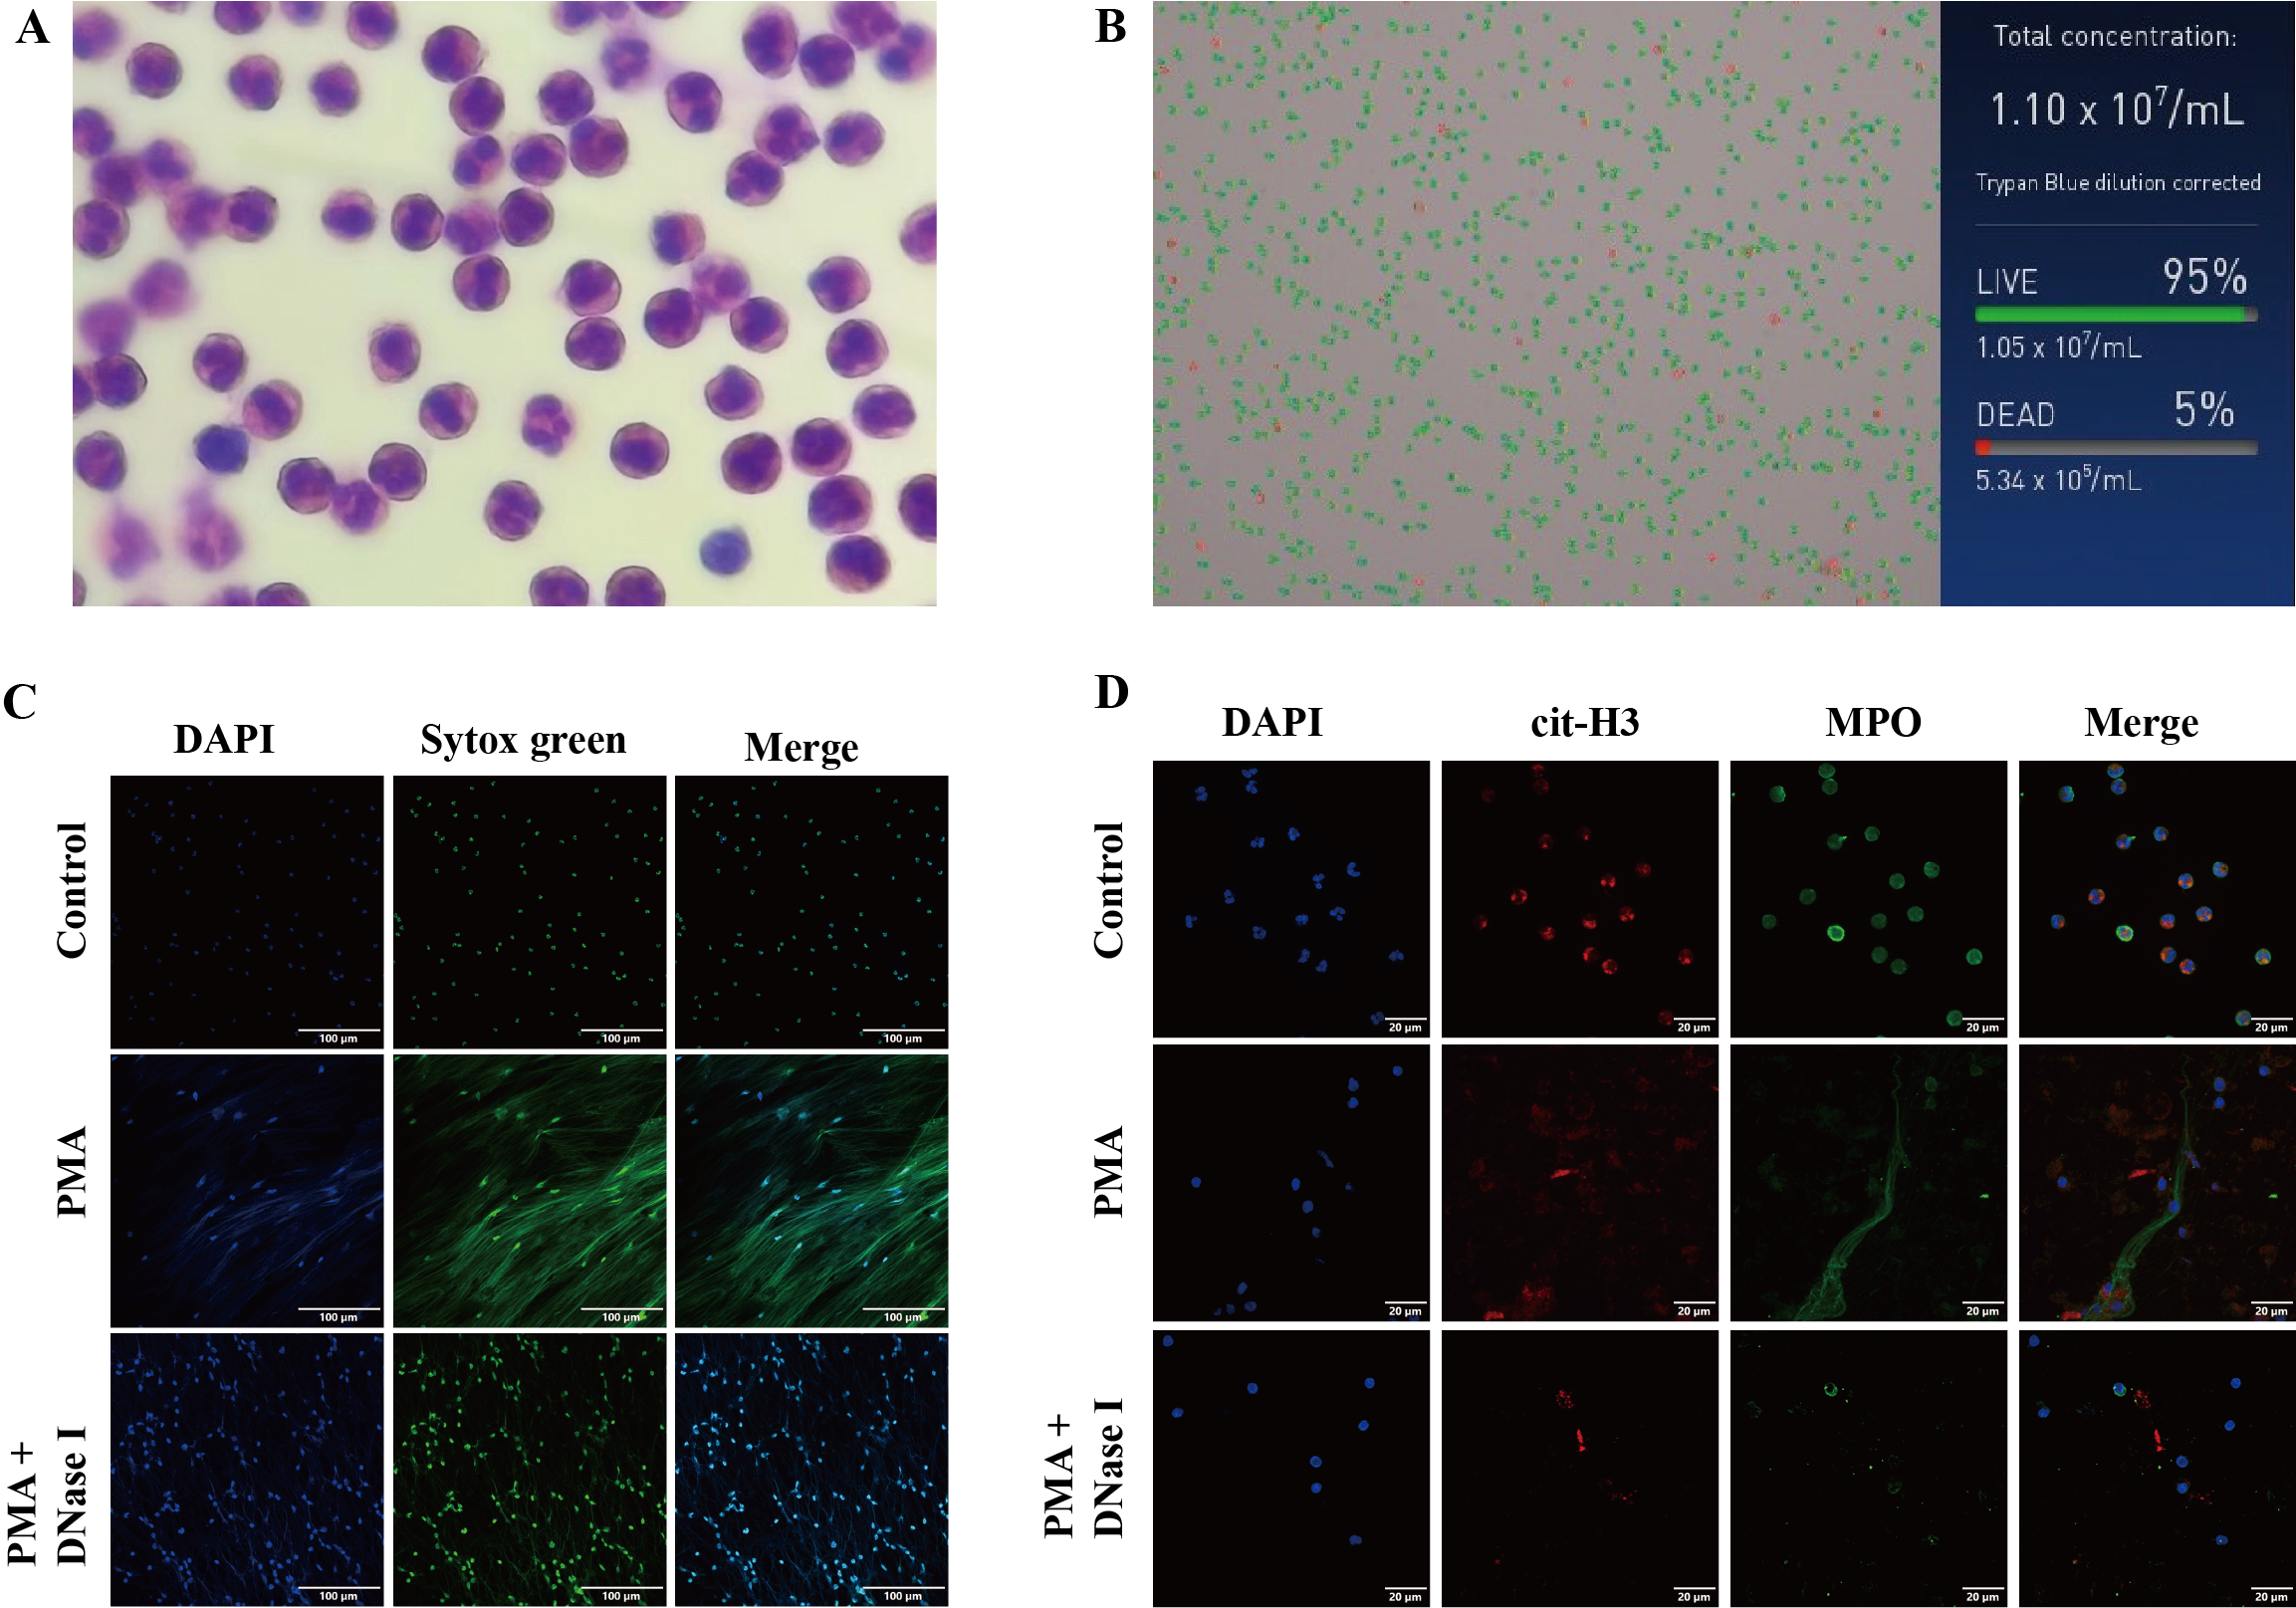


**Supplementary Figure 1. Neutrophil isolation, NETs preparation and identification.** (**A**) The characteristic multilobulated nuclear morphology of neutrophils was confirmed by Wright-Giemsa staining analysis. (**B**) The viability of neutrophil cells was assessed using Trypan blue staining analysis. (**C**) Extracellular DNA release from neutrophils was detected using Sytox Green fluorescence staining (green), while DAPI staining (blue) indicated nuclear localization. Scale bar = 100 μm. (**D**) NETs-specific markers, including citrullinated histone H3 (cit-H3, red) and myeloperoxidase (MPO, green), along with DAPI staining (blue) for nuclear localization, were identified using immunofluorescence confocal microscopy. Scale bar = 20 μm.


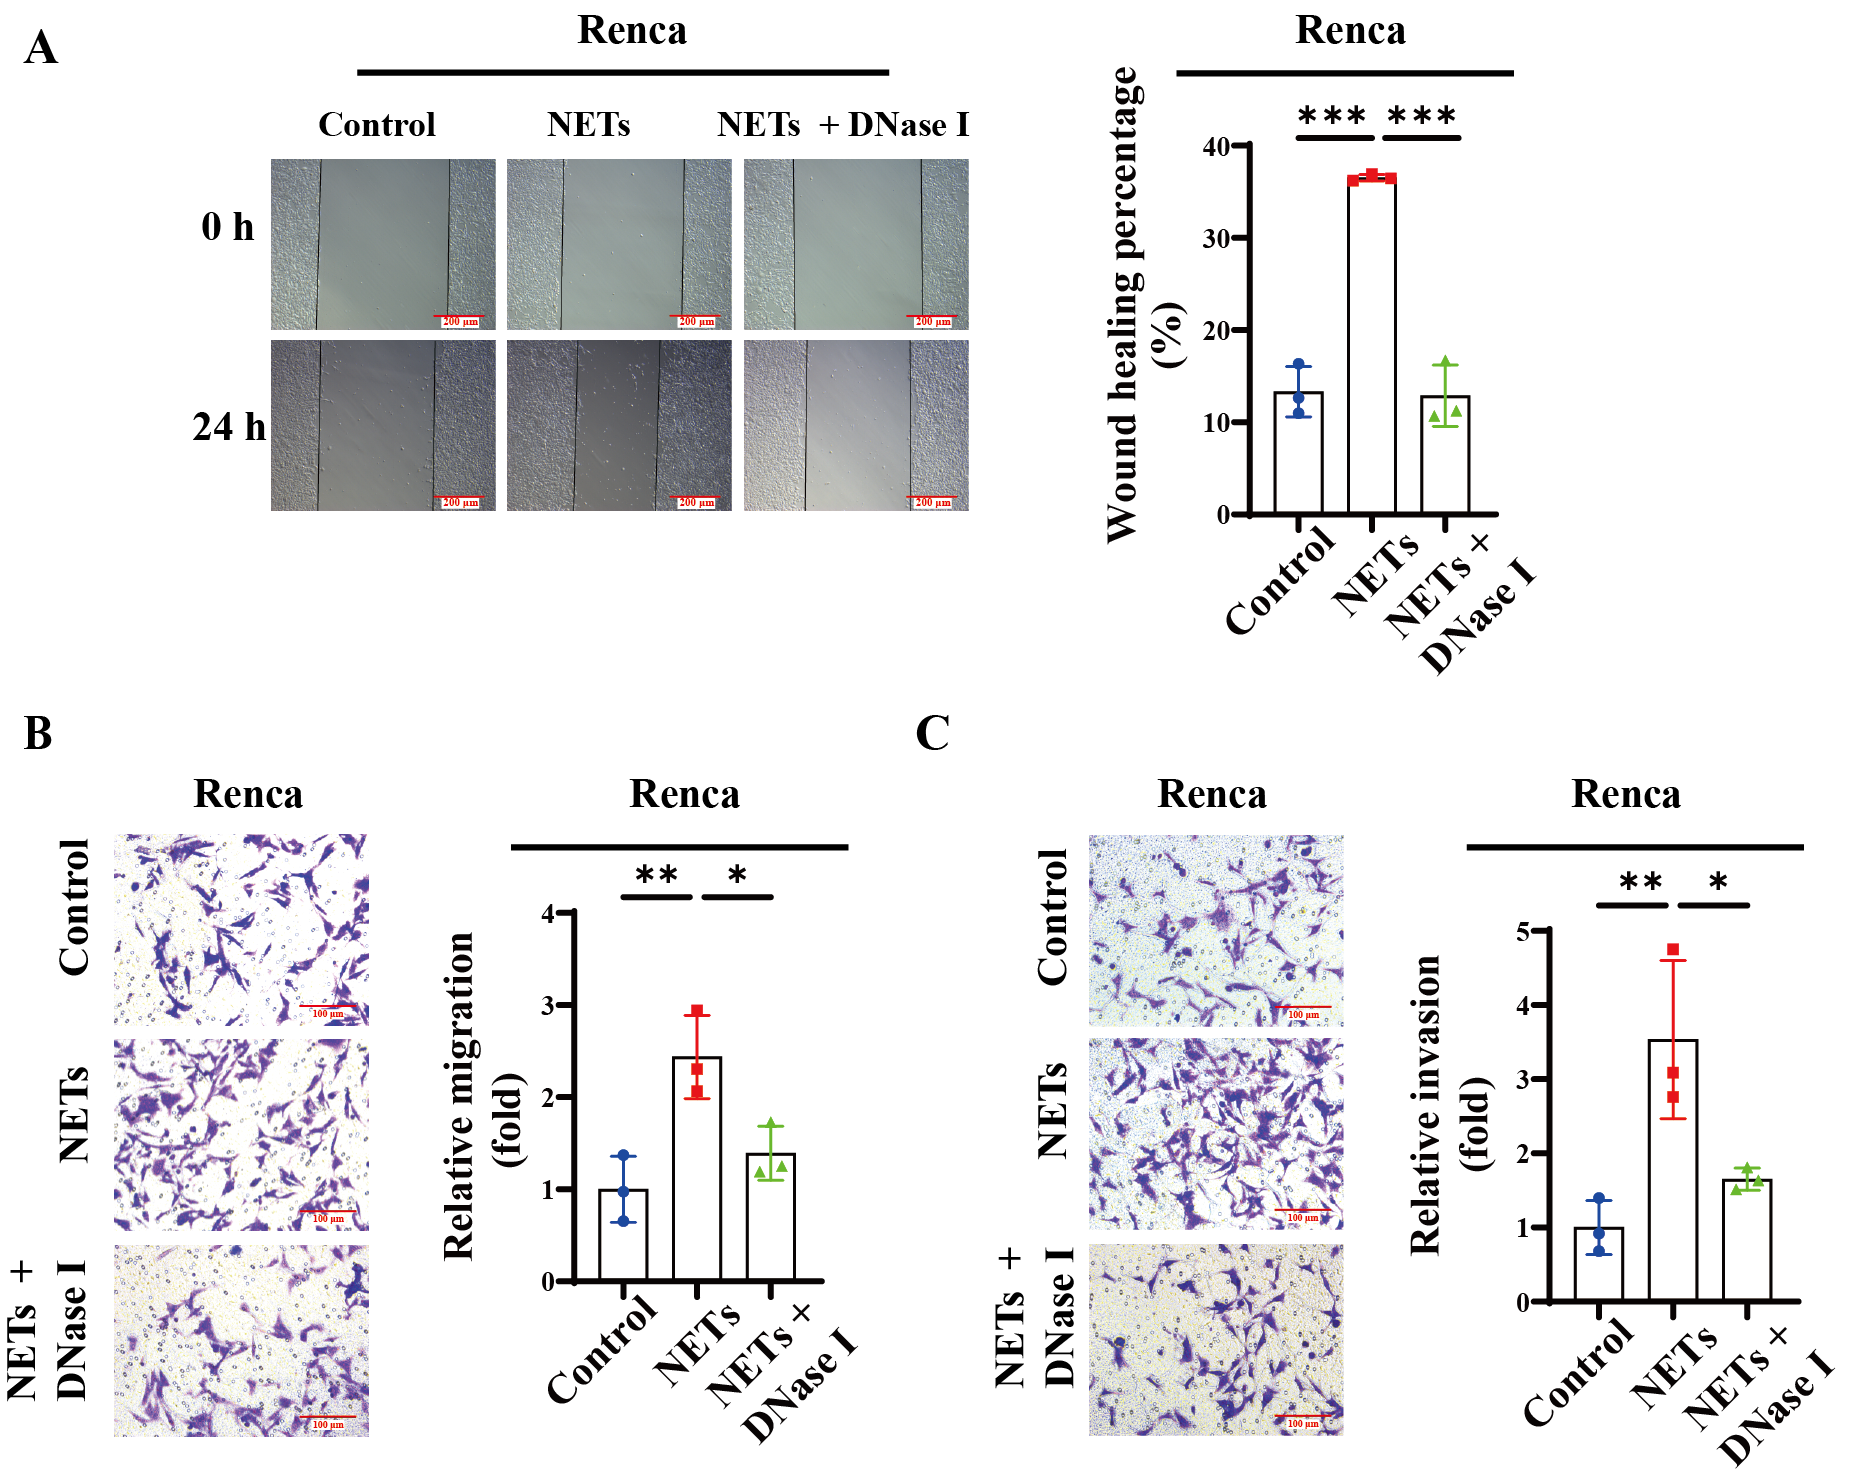


**Supplementary Figure 2. NETs promoted the migration and invasion capabilities of Renca cells.** The metastatic abilities of Renca cells following NETs treatment, with or without DNase I, were analyzed by wound-healing (**A**) and transwell assay (**B-C**). All experiments were independently repeated at least three times. Data are presented as mean ± SD from three independent experiments. Statistical analyses were performed using unpaired Student's *t*-tests.


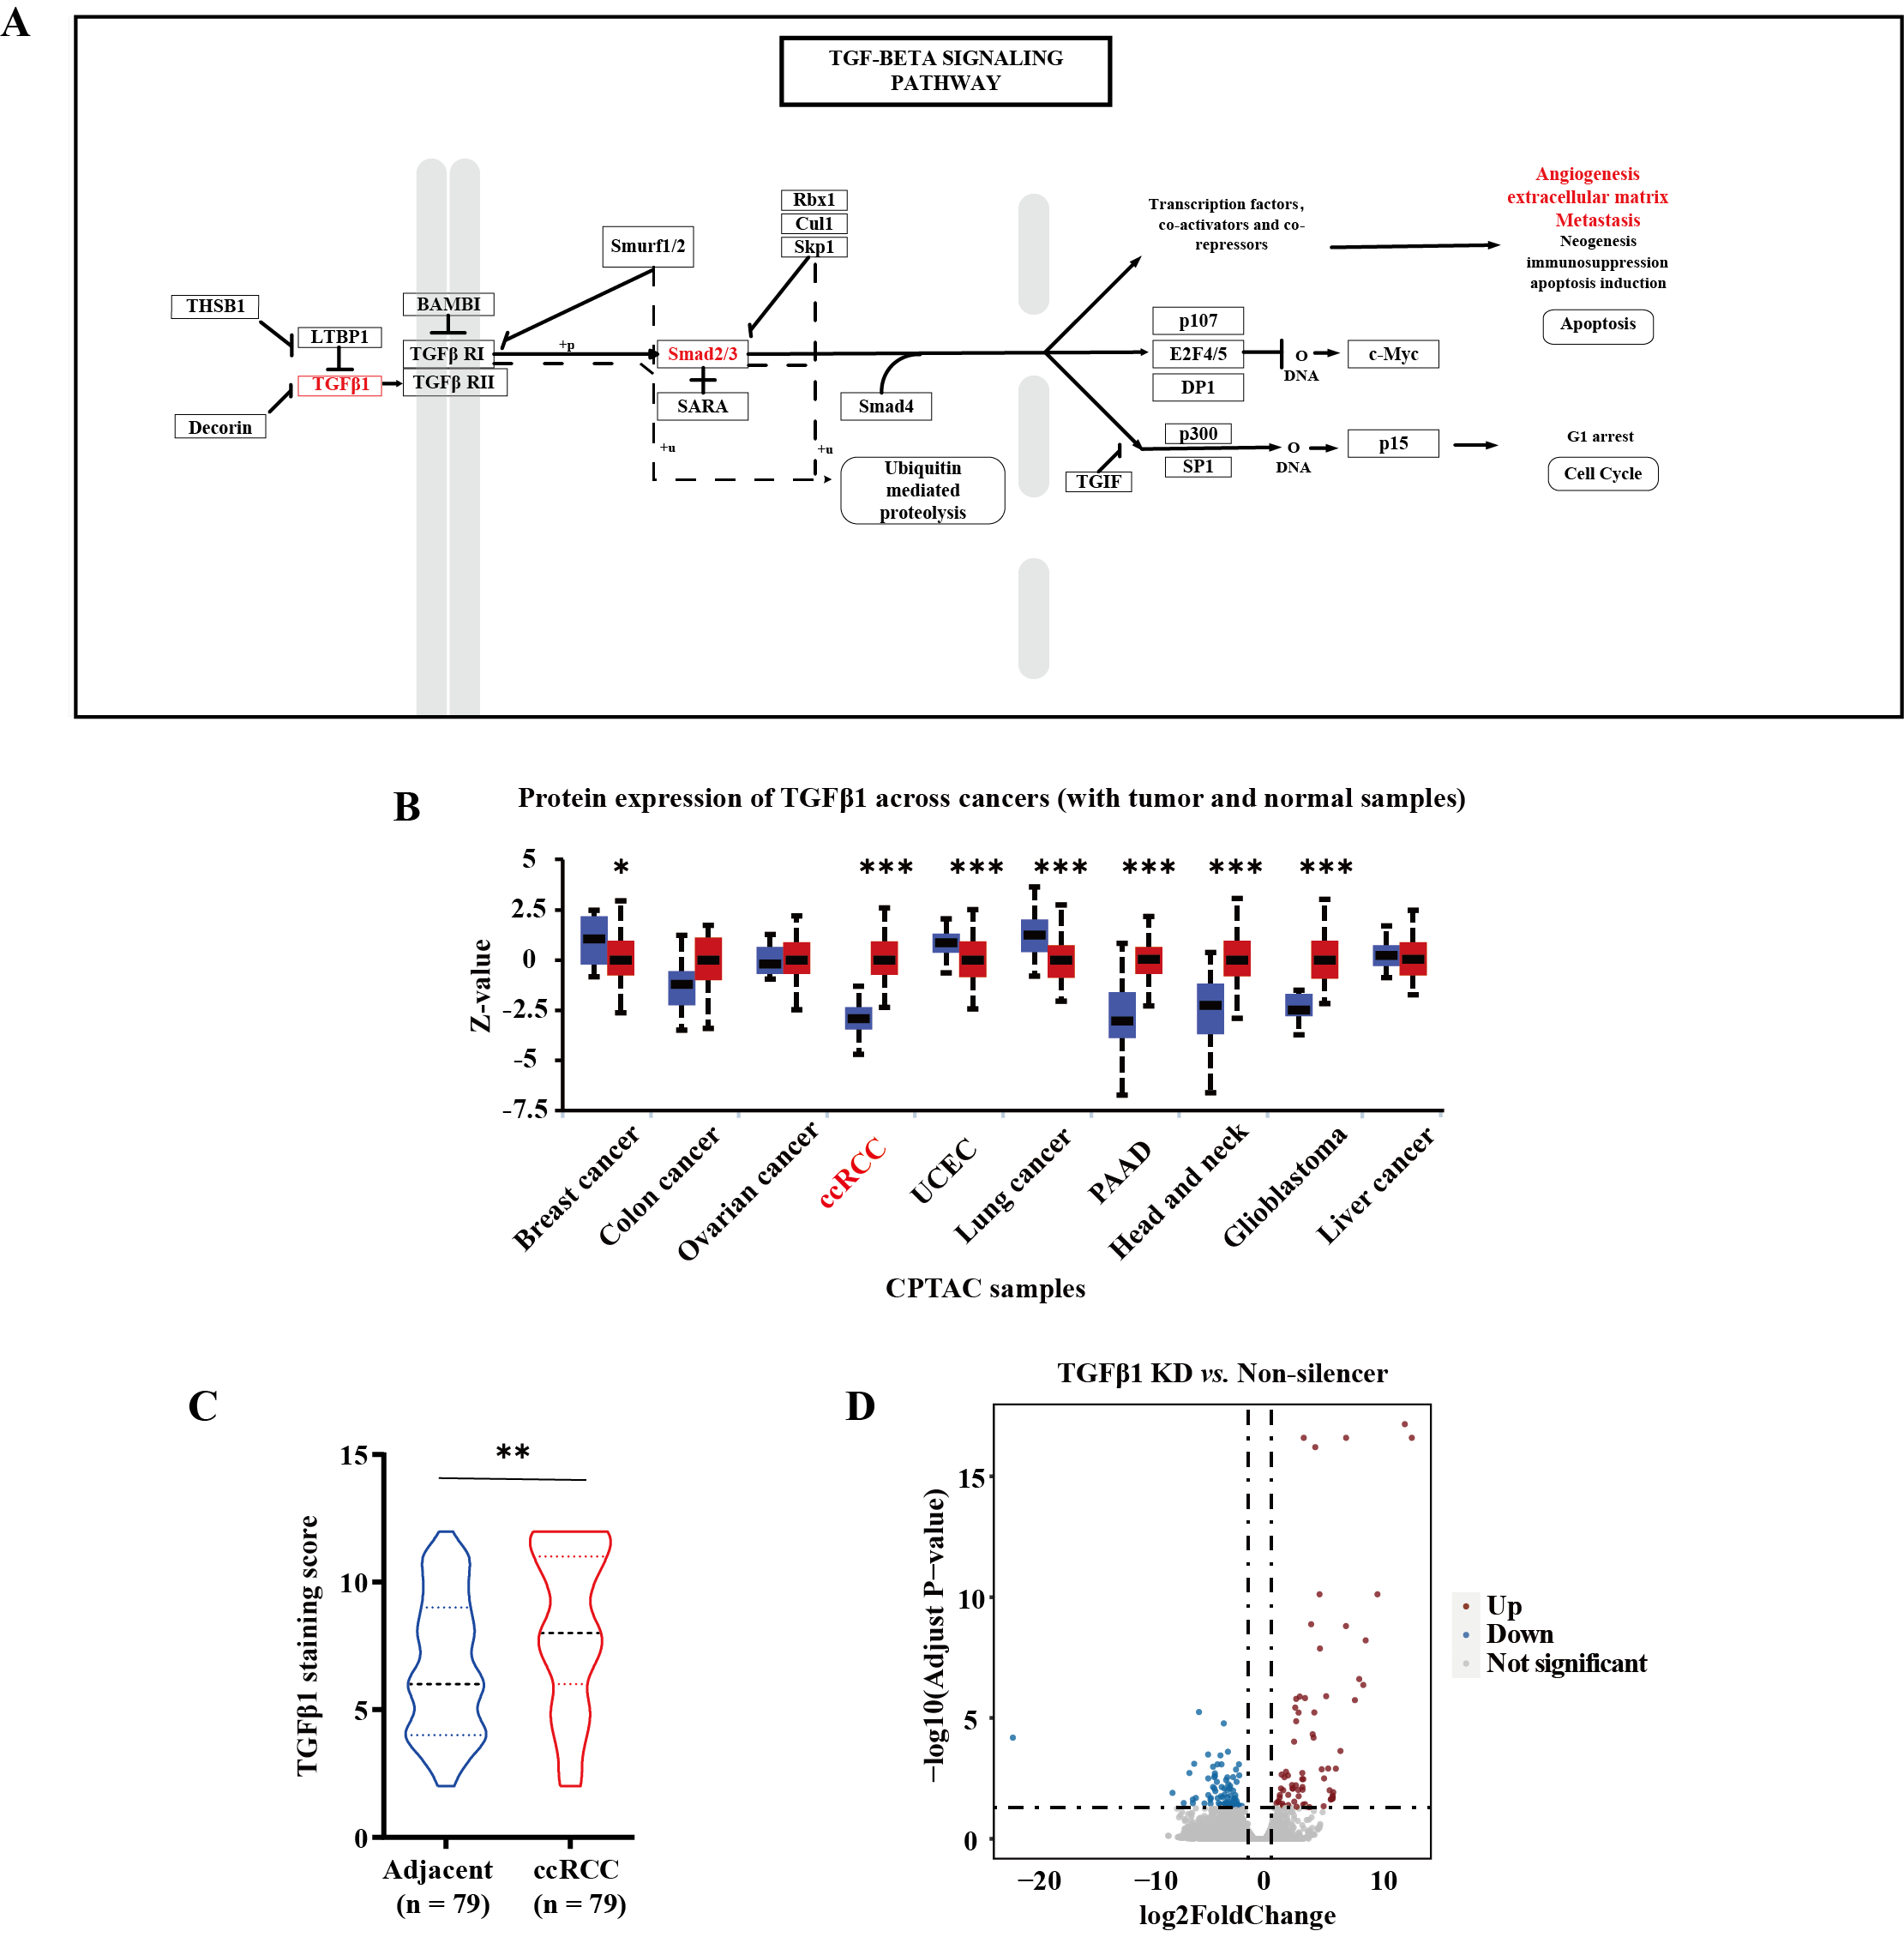


**Supplementary Figure 3.** (**A**) Schematic representation of the TGFβ1 signaling pathway. (**B**) The protein expression levels of TGFβ1 across different tumor types were analyzed using the UALCAN database. (**C**) The expression levels of TGFβ1 in ccRCC and adjacent normal tissues were analyzed using immunohistochemical staining (χ2 test). (**D**) Volcano plot analysis of differentially expressed genes in RNA-seq assays.


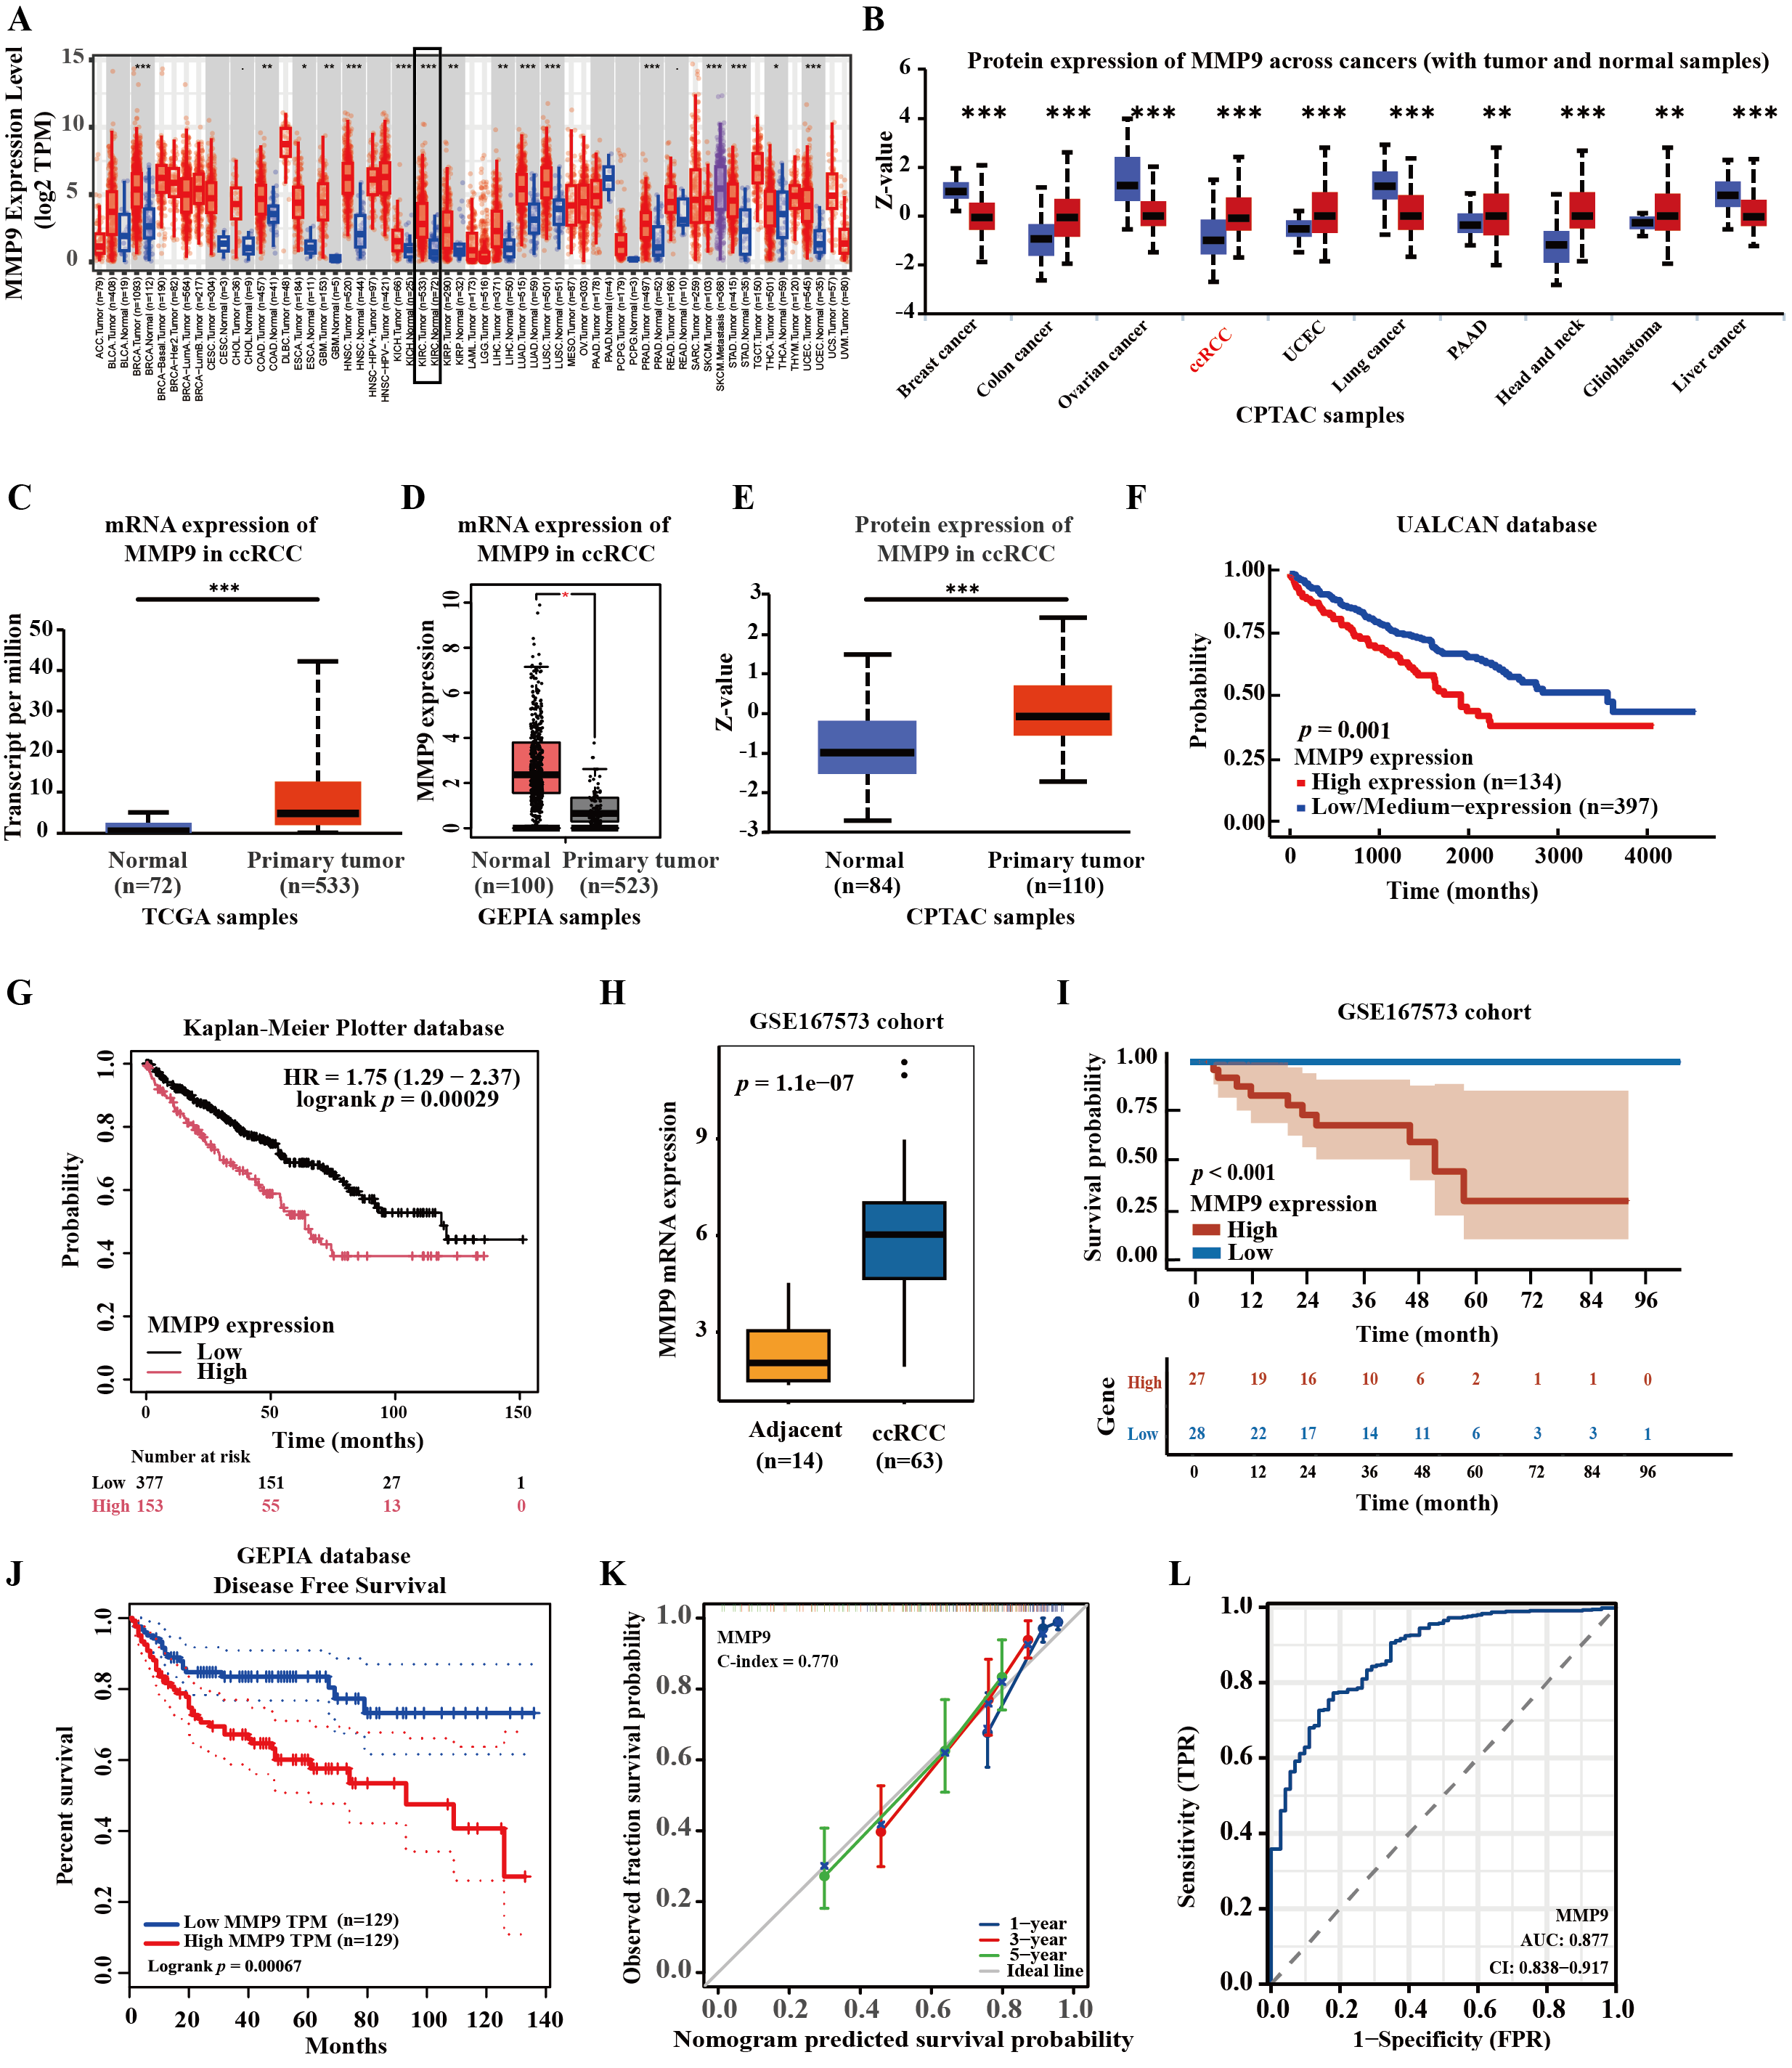


**Supplementary Figure 4. MMP9 was highly expressed in ccRCC tissues and was associated with unfavorable clinical outcomes in patients with ccRCC.** (**A**) The mRNA expression levels of MMP9 across different tumor types were analyzed using the TIMER2.0 database. (**B-I**) The expression of MMP9 in ccRCC tumor tissues and adjacent normal tissues, as well as its association with patient survival prognosis, was examined through data mining using the UALCAN (**B-C, E-F**), GEPIA (**D**), Kaplan-Meier Plotter (**G**), and GEO (GSE167573, **H-I**) databases. (**J**) The relationship between high and low expression levels of MMP9 and the disease-free survival prognosis in patients with ccRCC was analyzed through data mining based on the GEPIA database. (**K-L**) Calibration curve of the nomogram predicted survival probability (**K**), and ROC analysis of MMP9 in ccRCC (**L**) were conducted based on data mining from TCGA database.


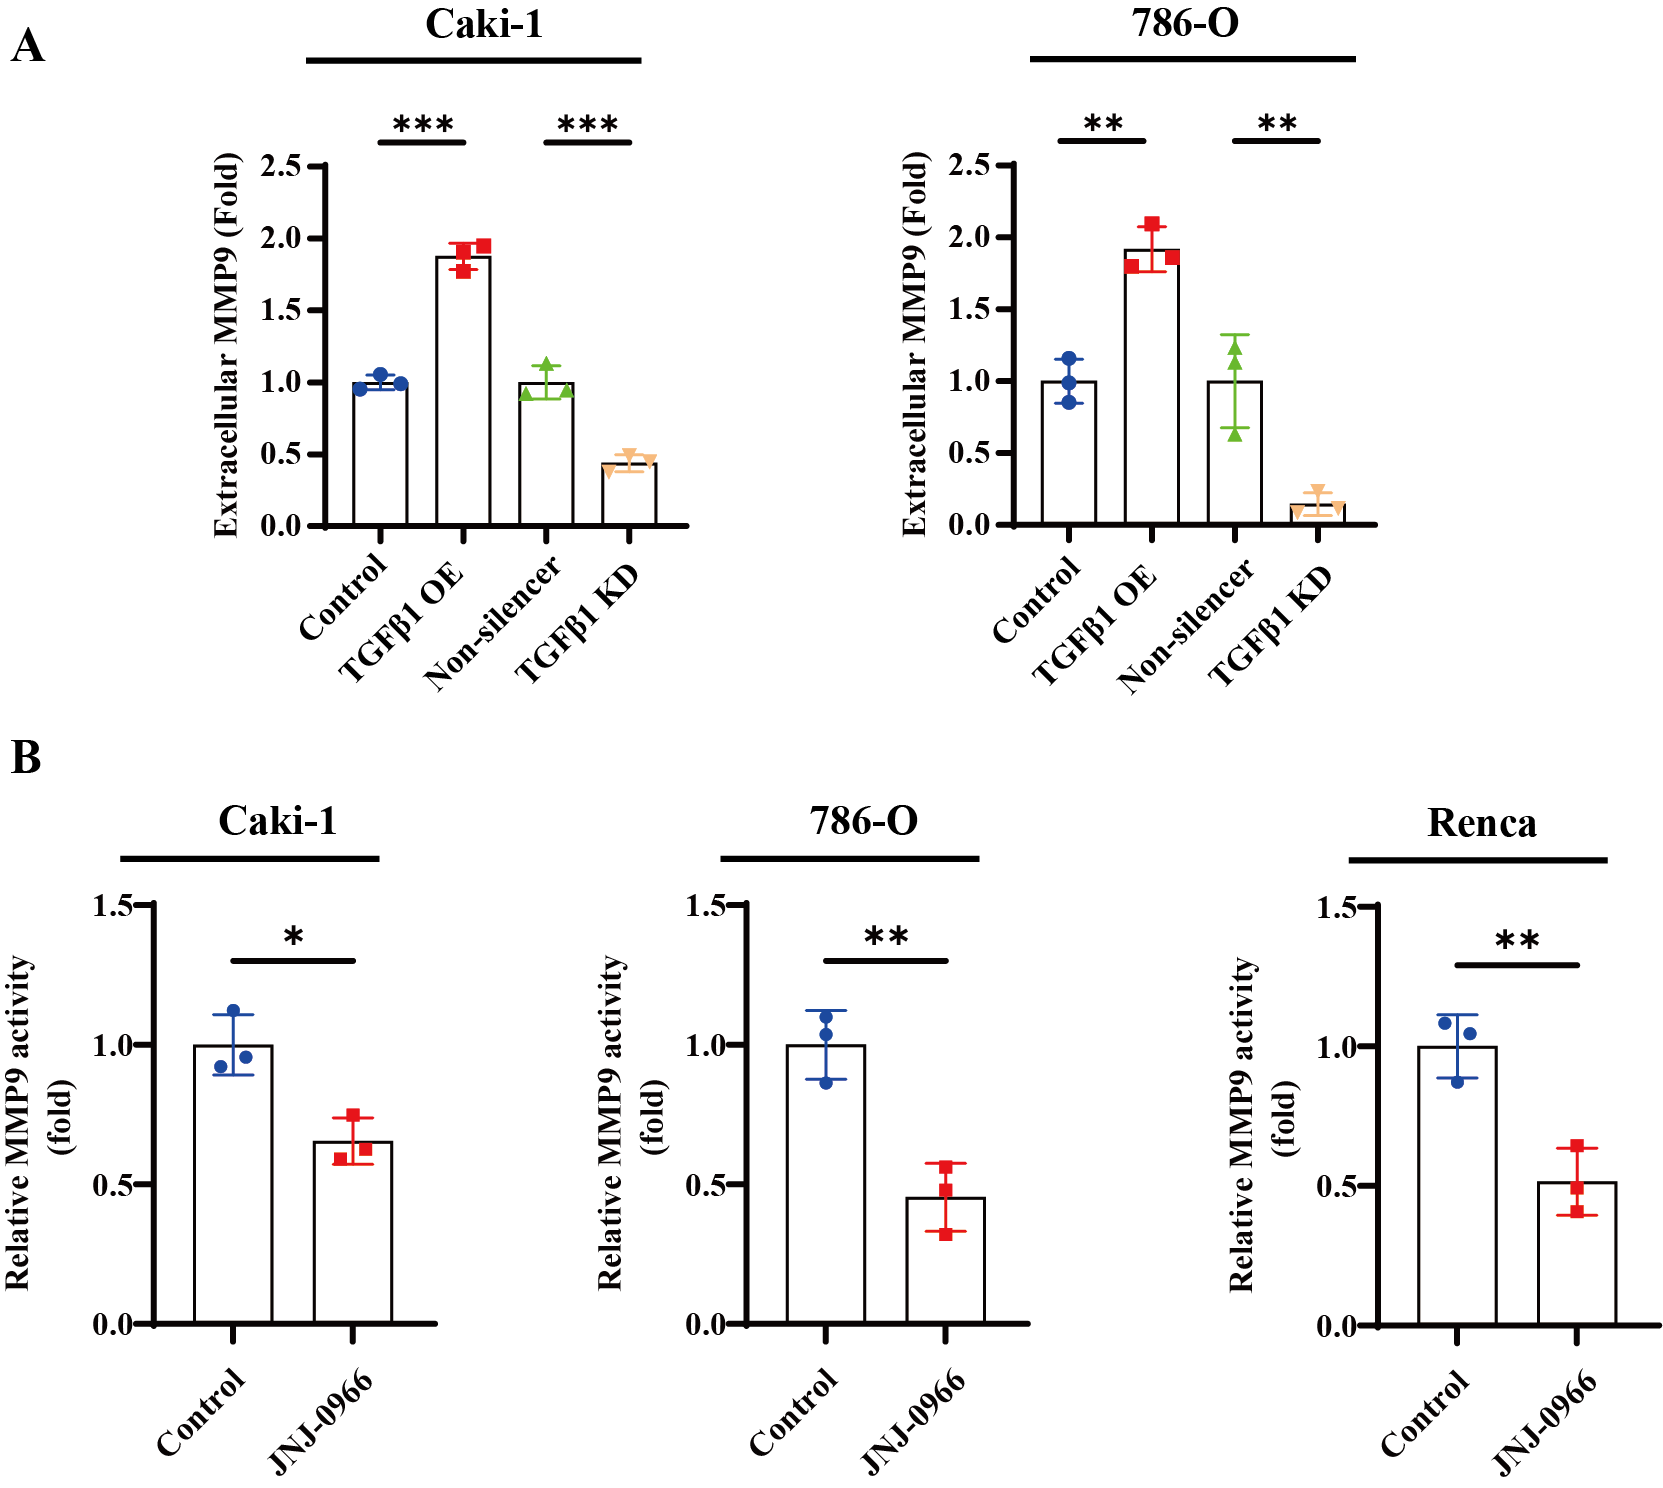


**Supplementary Figure 5. Assessment of MMP9 concentration and functional activity.** (**A**) MMP9 levels in the culture supernatants of TGFβ1 stably transfected ccRCC cell lines and their respective control cells were measured by ELISA. (**B**) The relative enzymatic activities of MMP9 in ccRCC cells following treatment with the MMP9 inhibitor (JNJ-0966), were evaluated using the MMP9 activity assay kit. All experiments were independently repeated at least three times. Data are presented as mean ± SD from three independent experiments. Statistical analyses were performed using unpaired Student's *t*-tests.


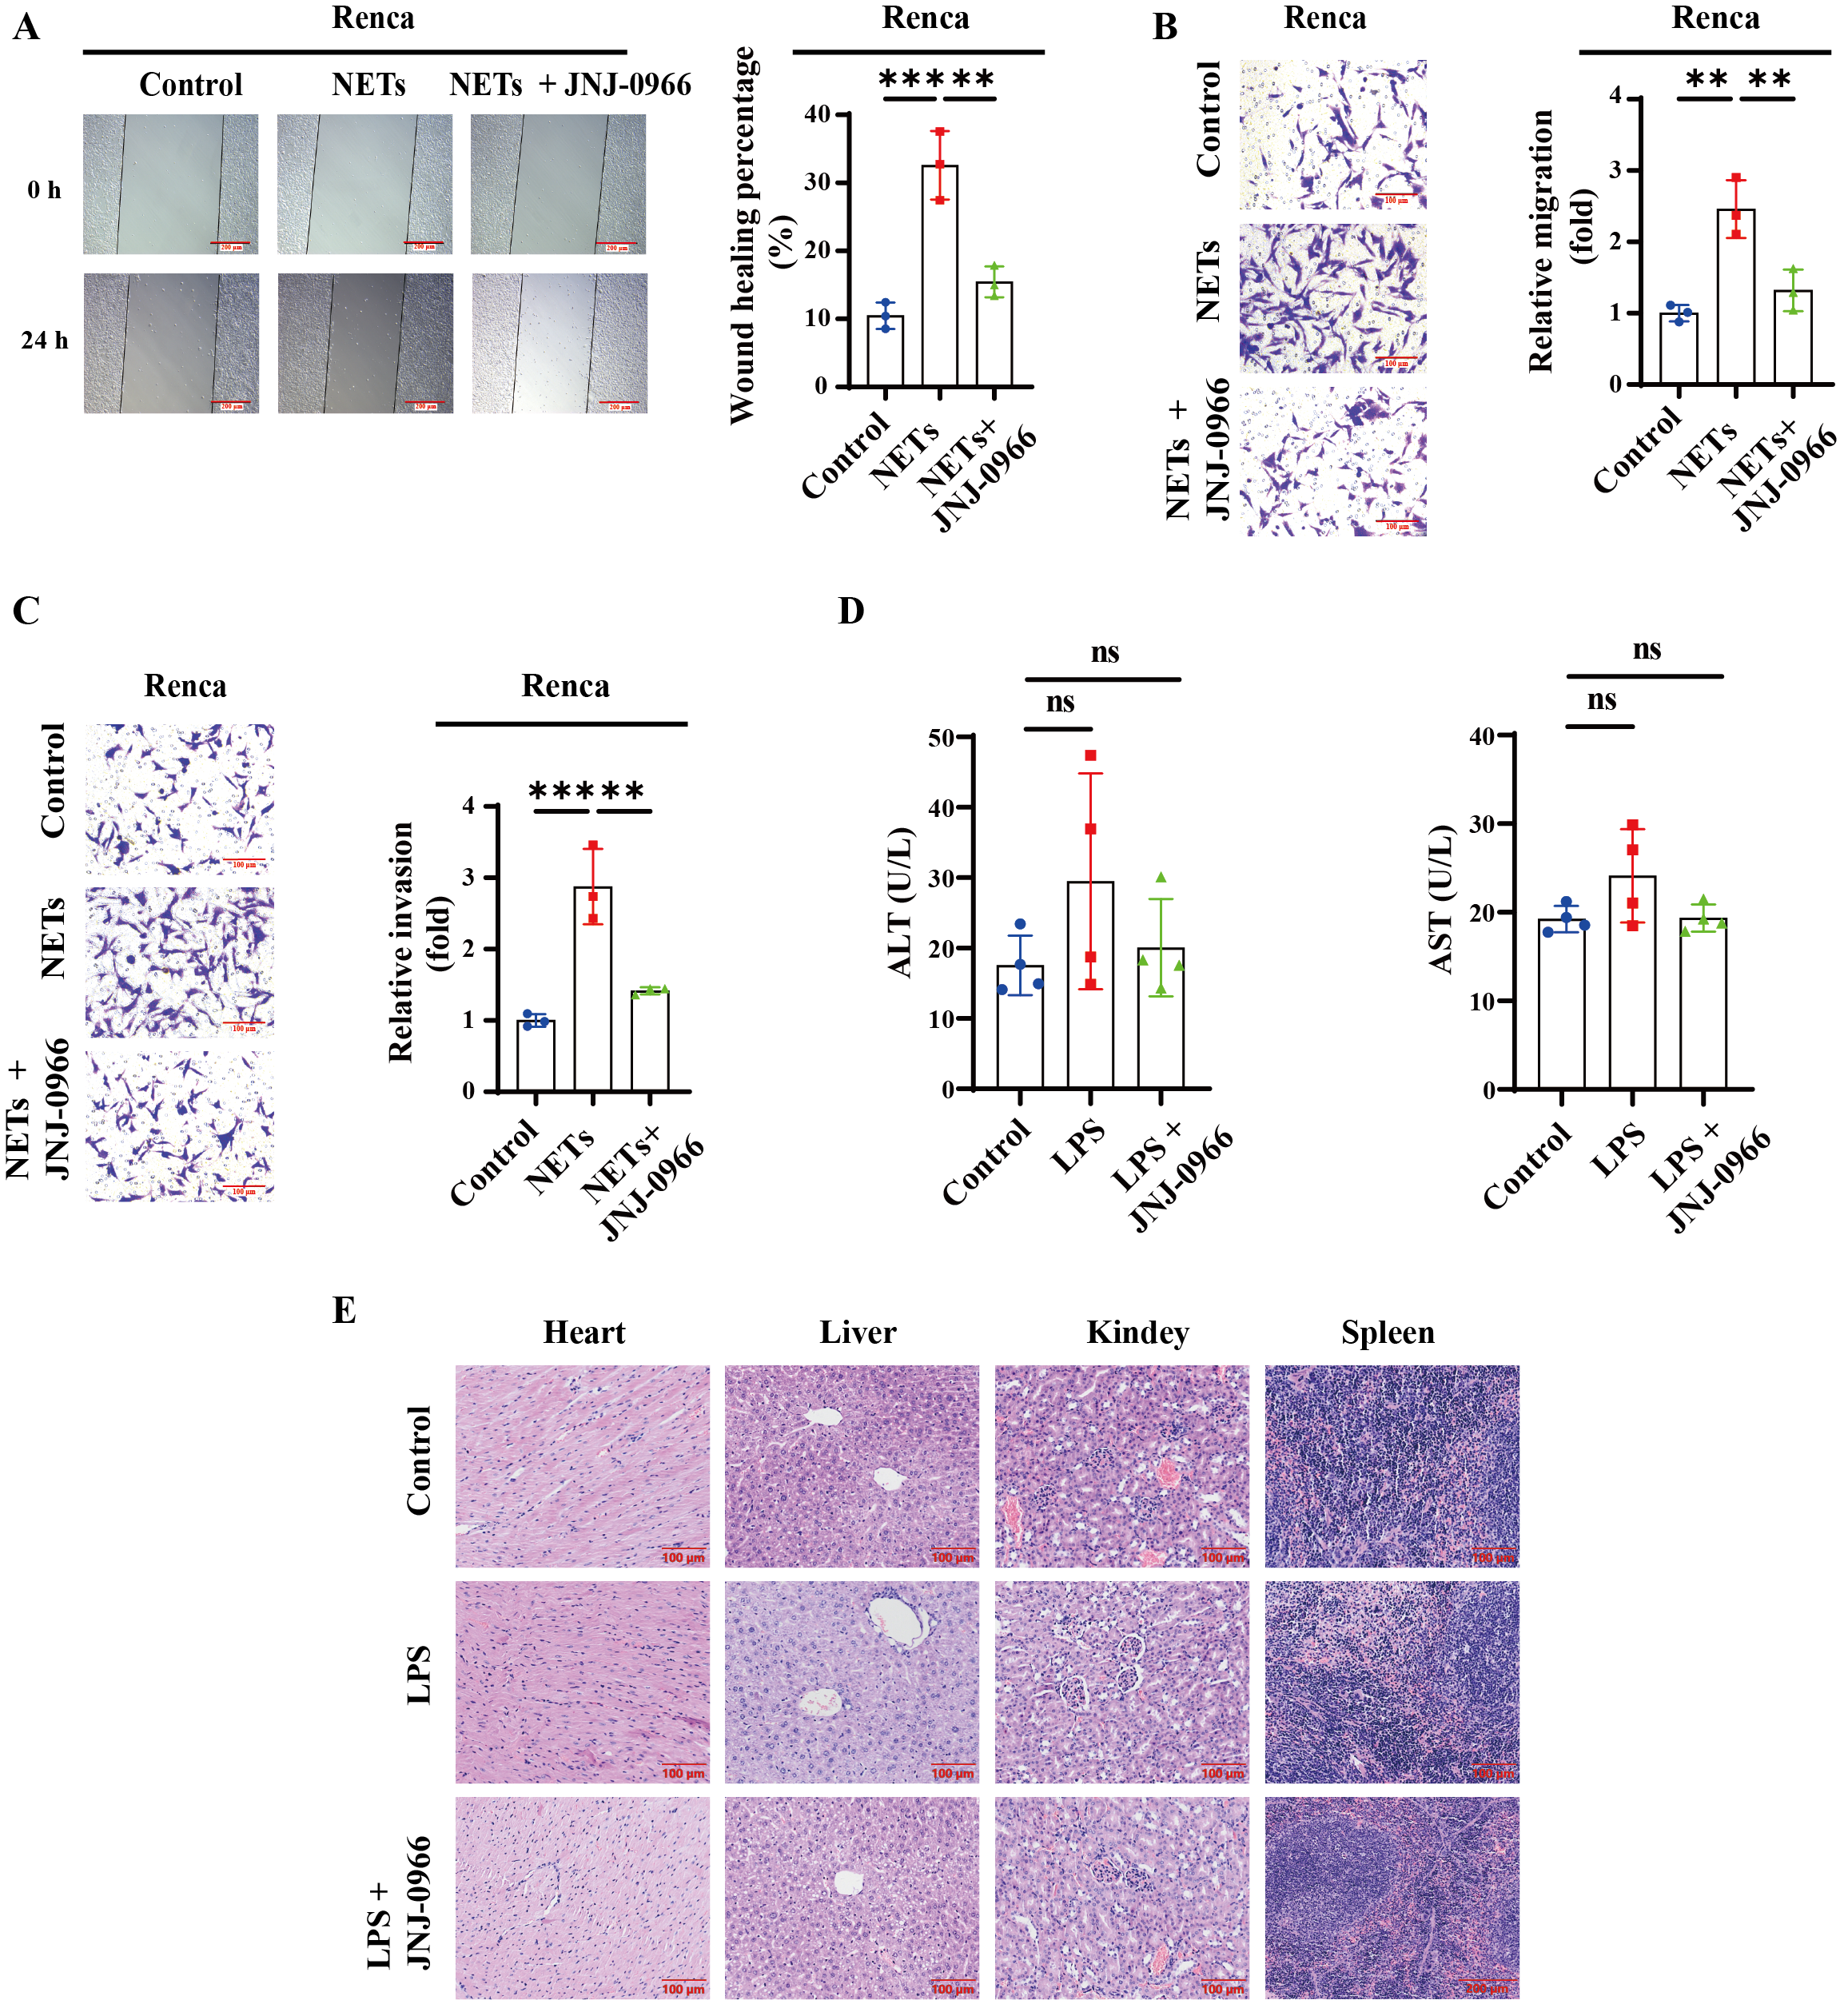


**Supplementary Figure 6. MMP9 inhibitors suppressed NETs-mediated ccRCC metastasis.** (**A-C**) The metastatic capacities of Renca cells following NETs treatment, with or without the MMP9 inhibitor (JNJ-0966), were analyzed using wound-healing (**A**) and transwell assays (**B-C**). (**D**) Plasma levels of ALT and AST in mice from different groups were quantified via colorimetric assays. (**E**) Organ damage to the heart, liver, kidney, and spleen in mice across experimental cohorts was assessed by H&E staining. All experiments were independently repeated at least three times. Data are presented as mean ± SD from three independent experiments. Statistical analyses were performed using unpaired Student's *t*-tests.

**Supplementary Table. Correlation between TGFβ1 expression levels and clinicopathologic characteristics in ccRCC were analyzed based on data mining from TCGA database.**

| **Characteristics** | **TGFβ1 Expression Levels** | | ***p* Value** |
| --- | --- | --- | --- |
| **Low**, n (%) | **High**, n (%) |
| **Age** |  |  | 0.699 |
| <= 60 | 132 (24.4%) | 137 (25.3%) |  |
| > 60 | 138 (25.5%) | 134 (24.8%) |  |
| **Gender** |  |  | 0.398 |
| Female | 98 (18.1%) | 89 (16.5%) |  |
| Male | 172 (31.8%) | 182 (33.6%) |  |
| **Pathologic T stage** |  |  | **0.017** |
| T1&T2 | 188 (34.8%) | 162 (29.9%) |  |
| T3&T4 | 82 (15.2%) | 109 (20.1%) |  |
| **Pathologic N stage** |  |  | 0.287 |
| N0 | 124 (48.1%) | 118 (45.7%) |  |
| N1 | 6 (2.3%) | 10 (3.9%) |  |
| **Pathologic M stage** |  |  | **0.049** |
| M0 | 220 (43.3%) | 209 (41.1%) |  |
| M1 | 31 (6.1%) | 48 (9.4%) |  |
| **Histologic grade** |  |  | 0.156 |
| G1&G2 | 132 (24.8%) | 118 (22.1%) |  |
| G3&G4 | 132 (24.8%) | 151 (28.3%) |  |
| **MMP9** |  |  | **< 0.001** |
| Low | 166 (30.7%) | 104 (19.2%) |  |
| High | 104 (19.2%) | 167 (30.9%) |  |

Significant *p*-value is in **bold.**
